# Supplementary material
Source: PubMed Central journal article supplement (PMC11344480)
Supplement: NIHMS2017570-supplement-Supplemental_material_text.pdf [file NIHMS2017570-supplement-Supplemental_material_text.pdf]

## **SUPPORTING INFORMATION**

### **Identification of dual-target compounds with antifungal and anti-NLRP3 inflammasome activity**

David J Lowes<sup>1</sup>, Jian Miao<sup>2</sup>, Rand A Al-waqfi<sup>2</sup>, Kristiana A. Avad<sup>2,3</sup>, Kirk E Hevener<sup>4\*</sup>, Brian M Peters<sup>1,5\*</sup>

<sup>1</sup>Department of Clinical Pharmacy and Translational Science, College of Pharmacy, University of Tennessee Health Science Center, Memphis, TN 38163

<sup>2</sup>Graduate Program in Pharmaceutical Sciences, College of Graduate Health Sciences, University of Tennessee Health Science Center, Memphis, TN 38163

<sup>3</sup>Doctor of Pharmacy Program, College of Pharmacy, University of Tennessee Health Science Center, Memphis, TN 38163

<sup>4</sup>Department of Pharmaceutical Sciences, College of Pharmacy, University of Tennessee Health Science Center, Memphis, TN 38163

<sup>5</sup>Department of Microbiology, Immunology, and Biochemistry, College of Medicine, University of Tennessee Health Science Center, Memphis, TN 38163

\*Address correspondence to Brian M Peters at [brian.peters@uthsc.edu](mailto:brian.peters@uthsc.edu) or Kirk E Hevener at [khevener@uthsc.edu](mailto:khevener@uthsc.edu).

## **Table of Contents**

|                                                                                             |            |
|---------------------------------------------------------------------------------------------|------------|
| <b>Table S1. Maybridge Compounds..</b>                                                      | <b>S3</b>  |
| <b>Table S2. Strains used or created in this study.</b>                                     | <b>S5</b>  |
| <b>Table S3. Primers used in this study.</b>                                                | <b>S6</b>  |
| <b>Figure S1. IL-1<math>\beta</math> release in THP-1 cells is largely NLRP3-dependent.</b> | <b>S7</b>  |
| <b>Figure S2. Alignment of AHAS orthologs from several <i>Candida</i> species.</b>          | <b>S8</b>  |
| <b>Figure S3. LC/MS confirmation of purity/identify of lead compounds 10 and 10a.</b>       | <b>S9</b>  |
| <b>Supporting PDB structures submitted as separate attachments</b>                          | <b>S10</b> |
| <b>References</b>                                                                           | <b>S11</b> |

**Table S1. Maybridge Compounds.** Details on predicted actives compounds ordered and experimentally tested.

| Cmpd # | Structure                                                                           | SMILES                                                       | Vendor # | AHAS Docking Score | NLRP3 Docking Score | PAINS Filter | Aggregation Filter |
|--------|-------------------------------------------------------------------------------------|--------------------------------------------------------------|----------|--------------------|---------------------|--------------|--------------------|
| 1      | 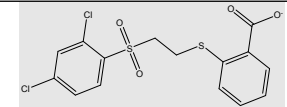   | <chem>c1cccc(c1C([O-])=O)SCCS(=O)(=O)c2c(Cl)cc(Cl)cc2</chem> | HTS02260 | -9.79              | -8.78               | Passed       | Passed             |
| 2      |    | <chem>c1cccc(C([O-])=O)c1C(=O)N(C)CCc2cccn2</chem>           | HTS09182 | -10.18             | -8.52               | Passed       | Passed             |
| 3      |    | <chem>COc(cc1ccc1CCNC(=O)c2c(C)onc2-c3c(F)cccc3Cl</chem>     | JFD01669 | -9.89              | -10.14              | Passed       | Passed             |
| 4      |    | <chem>c1cc(F)cc(F)c1NC(=O)Cn(n2)nnc2-c(cc3)ccc3C</chem>      | NRB00134 | -9.70              | -8.63               | Passed       | Passed             |
| 5      |    | <chem>Cc1c(Cl)cc(cc1)NC(=O)CC(CC([O-])=O)c2cccc2</chem>      | PD00456  | -9.47              | -9.17               | Passed       | Passed             |
| 6      |   | <chem>c1cccc1C(CC([O-])=O)CC(=O)Nc2cccc(c23)CCCC3</chem>     | PD00462  | -10.07             | -8.33               | Passed       | Passed             |
| 7      |  | <chem>c1cc(Cl)ccc1SC(C2=O)CC(=O)N2c3cc(Cl)cc(Cl)c3</chem>    | RJC03163 | -9.83              | -8.54               | Passed       | Passed             |

|                                                                        |                                                                                     |                                                                      |          |                  |       |        |        |
|------------------------------------------------------------------------|-------------------------------------------------------------------------------------|----------------------------------------------------------------------|----------|------------------|-------|--------|--------|
| 8                                                                      | 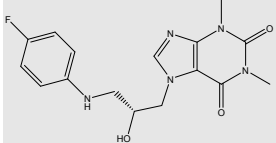    | <chem>c1cc(F)ccc1NCC(O)Cn2cnc(c23)n(C)c(=O)n(C)c3=O</chem>           | RJC03968 | -9.381           | -9.33 | Passed | Passed |
| 9                                                                      |    | <chem>Clc1cccc(F)c1C(=O)Nc2cnc3ccccc3</chem>                         | S12245   | -9.45            | -9.74 | Passed | Passed |
| 10                                                                     |    | <chem>c1ccccc1C(=O)CC(c2ccc(F)cc2)Sc3c([O-])=Occcc3</chem>           | S15464   | -10.19           | -9.48 | Passed | Passed |
| 11                                                                     |    | <chem>Fc1c(Cl)cc(cc1)SCC(=O)c2ccc(c23)OCCO3</chem>                   | SPB08273 | -9.38            | -8.28 | Passed | Passed |
| 12                                                                     |    | <chem>Oc1cc(O)cc(c12)oc(c2=O)O)-c3cc(O)c(O)cc3</chem>                | XBX00307 | -8.36            | -8.36 | Failed | Passed |
| <b>Structures &amp; Docking Scores for Known AHAS/NLRP3 Inhibitors</b> |                                                                                     |                                                                      |          |                  |       |        |        |
| 13                                                                     |   | <chem>CCOC(=O)c1c(cccc1)S(=O)(=O)NC(=O)Nc2nc(Cl)cc2OC</chem>         | C.E.     | -6.06            | -1.98 | Passed | Passed |
| 14                                                                     |  | <chem>CC(C)(O)c1cc(oc1)S(=O)(=O)NC(=O)Nc2c(CCC3)c3cc(c24)CCC4</chem> | MCC950   | N/A <sup>a</sup> | -7.64 | Passed | Passed |

<sup>a</sup>No docking results could be generated for MCC950 in AHAS due to steric restrictions of the active site.

**Table S2. Strains used or created in this study.**

| <b>Strain Name</b> | <b>Parent</b> | <b>Species</b>         | <b>Genotype</b>                                                      | <b>Reference</b> |
|--------------------|---------------|------------------------|----------------------------------------------------------------------|------------------|
| SC5314             | n/a           | <i>C. albicans</i>     | reference                                                            | 1                |
| [429]0832          | n/a           | <i>C. auris</i>        | wild-type                                                            | 1                |
| CD36               | n/a           | <i>C. dubliniensis</i> | reference                                                            | 1                |
| CBS138             | n/a           | <i>C. glabrata</i>     | reference                                                            | 1                |
| 81-B-5             | n/a           | <i>C. krusei</i>       | wild-type                                                            | 1                |
| CDC317             | n/a           | <i>C. parapsilosis</i> | reference                                                            | 1                |
| MYA3404            | n/a           | <i>C. tropicalis</i>   | reference                                                            | 1                |
| BWP17              | SC5314        | <i>C. albicans</i>     | <i>ILV2/ILV2 Δ/Δarg4 Δ/Δhis1 Δ/Δura3</i>                             | 2                |
| JM01               | BWP17         | <i>C. albicans</i>     | <i>ILV2/Δilv2::ARG4 Δ/Δhis1 Δ/Δura3</i>                              | This study       |
| JM02               | JM01          | <i>C. albicans</i>     | <i>ILV2/Δilv2::ARG4 Δ/Δhis1 Δura3/Δura3::URA3</i>                    | This study       |
| JM03               | JM01          | <i>C. albicans</i>     | <i>ILV2/Δilv2::ARG4 Δ/Δhis1 Δura3/Δura3::URA3-PrACT1-ILV2</i>        | This study       |
| JM04               | JM01          | <i>C. albicans</i>     | <i>ILV2/Δilv2::ARG4 Δ/Δhis1 Δura3/Δura3::URA3-PrTEF1-ILV2</i>        | This study       |
| JM05               | JM02          | <i>C. albicans</i>     | <i>ILV2/Δilv2::ARG4 Δ/Δhis1::HIS1 Δura3/Δura3::URA3</i>              | This study       |
| JM06               | JM03          | <i>C. albicans</i>     | <i>Δilv2::HIS1/Δilv2::ARG4 Δ/Δhis1 Δura3/Δura3::URA3-PrACT1-ILV2</i> | This study       |
| JM07               | JM04          | <i>C. albicans</i>     | <i>Δilv2::HIS1/Δilv2::ARG4 Δ/Δhis1 Δura3/Δura3::URA3-PrTEF1-ILV2</i> | This study       |



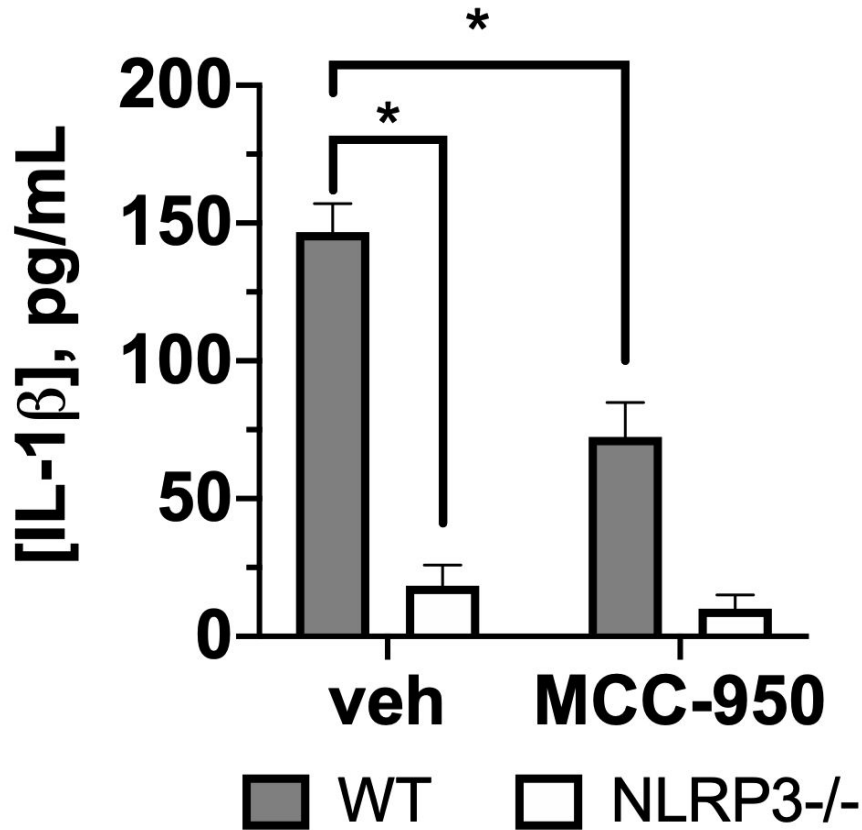

**Figure S1. IL-1 $\beta$  release in THP1 cells is largely NLRP3-dependent.** Differentiated WT or NLRP3<sup>-/-</sup> THP1 cells were treated with vehicle (0.5% DMSO) or 10 nM MCC-950 for 1 h prior to challenge with LPS (20 ng) for 3.5 h and ATP (5 mM) for 30 min. IL-1 $\beta$  release was quantified by ELISA and blank values subtracted from unstimulated controls. Data is the mean of independent experiments (n=3) conducted in technical quadruplicate. Data was analyzed using a one-way ANOVA and Tukey's post-test. \*, p < 0.05.

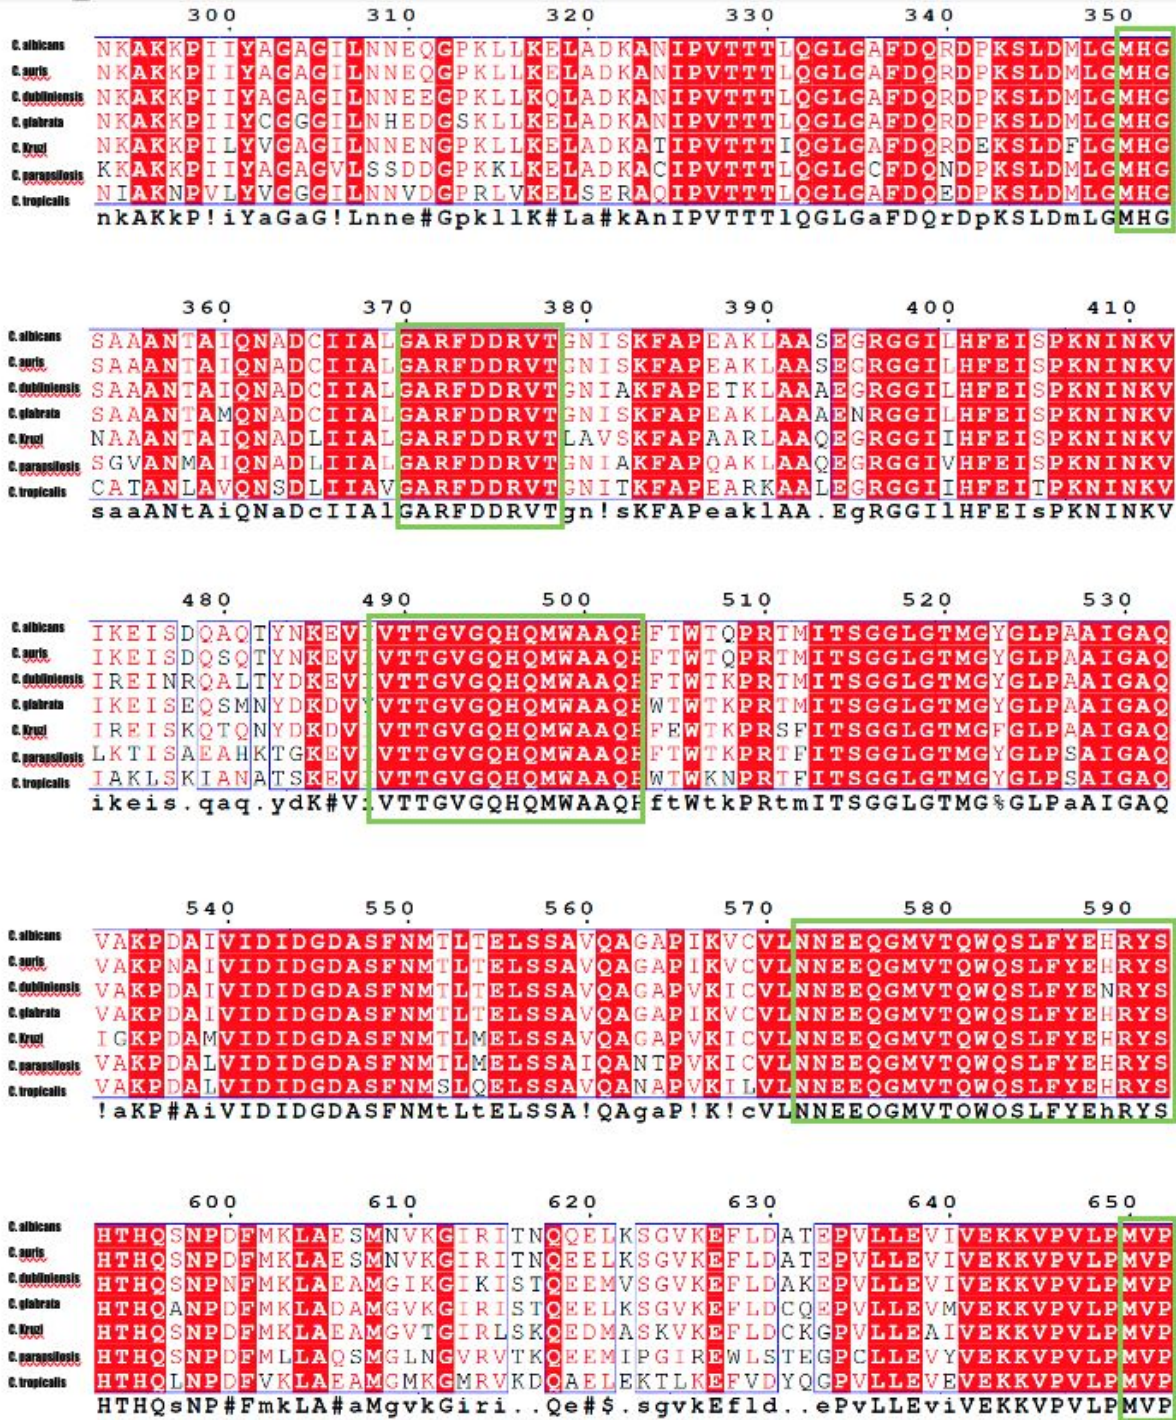

**Figure S2. Alignment of AHAS orthologs from several *Candida* species.** ClustalW was used to generate alignments of the AHAS protein from several clinically relevant *Candida* species and shows a high degree of sequence conservation, with near 100% identity of active site residues (boxed in green). The sole outlier being *C. dubliniensis* H589N.



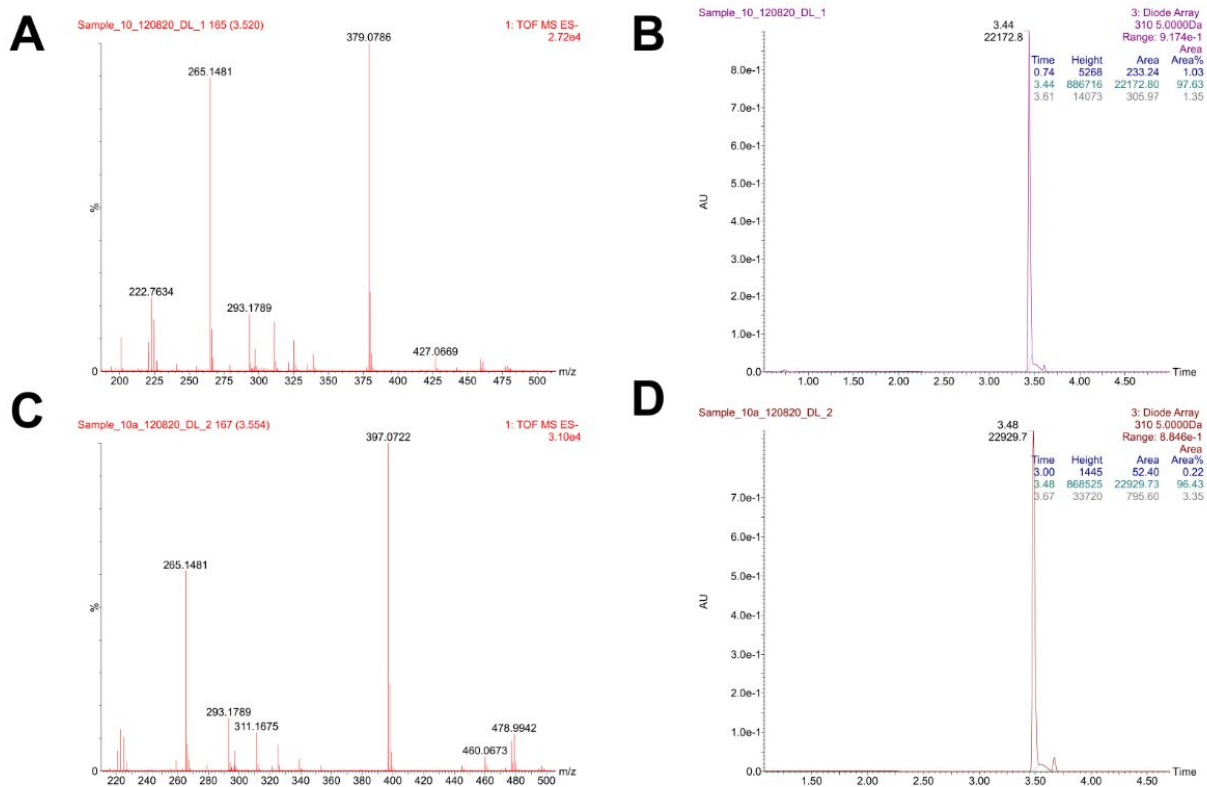

**Figure S3. LC/MS confirmation of purity/identity of lead compounds 10 and 10a. (A)** Chromatogram of compound **10** using photo diode array detection. **(B)** Time of flight mass spectrum of compound **10** using negative ionization mode. **(C)** Chromatogram of compound **10a** using photo diode array detection. **(D)** Time of flight mass spectrum of compound **10a** using negative ionization mode.

**Supporting PDB structures submitted as separate attachments:**

- A. *SupportingA\_MCC950\_NLRP3\_CoStructure.pdb*
- B. *SupportingB\_Compound10\_NLRP3\_CoStructure.pdb*
- C. *SupportingC\_Compound10\_AHAS\_CoStructure.pdb*

## References

1. Willems, H. M. E.; Lowes, D. J.; Barker, K. S.; Palmer, G. E.; Peters, B. M. Comparative Analysis of the Capacity of the *Candida* Species To Elicit Vaginal Immunopathology. *Infect Immun* **2018**, 86, e00527-18.
2. Wilson, R. B.; Davis, D.; Mitchell, A. P. Rapid hypothesis testing with *Candida albicans* through gene disruption with short homology regions. *J Bacteriol* **1999**, 181, 1868-1874.
